# Supplementary material
Source: publisher figshare collection journal article supplement (https://springernature.figshare.com/ndownloader/files/18095276)
Supplement: Supplementary file 1 [file 18095276]

## Sheet: Video Scoring Variables by Cat.
Additional File 2_Table of variable and category descriptions used in scoring CRITTERCAM video.
Novel foraging strategies observed in a growing Leopard seal (Hydrurga leptonyx) population at Cape Shirreff, Livingston Island Douglas J Krause, Michael E Goebel, Gregory J Marshall and Kyler Abernathy
Category	Variable	Description
Habitat Type
	shallow	Intertidal areas. Potential metrics : water shallow enough to restrict the movement of the leopard seal, can clearly see both benthos and water surface in the same frame, depth no more than 3 times the width of the seal (estimated).
	coastal	Not intertidal, but close to shore. Potential metrics: can see land within ~250 meters, can quickly pick out benthic features during dives.
	deep	Relative term to describe areas not immediately proximate to shore. Potential metrics: no land seen when seal is at the surface, not able to see benthic features clearly when diving (because they are absent, or due to decreased light levels).
	low light	Habitat type cannot be determined because the light level in the video is too low.
Behavior
	hauled out	The seal's body is completely out of the water.
	resting	The seal's body is in water (entirely or partially), but not moving. This includes, but is not limited to obvious sleeping behavior. Potential metrics: no body motion or water (particles in the water) movement generated by the seal's movement, obviously limp head motion in correspondence to wave motion in near shore areas (i.e. floating with the tidal surge).
	waiting	The same as resting, but immediately followed by foraging attempt (pre-ambush).
	traveling	Apparently moving directly from one place to another, not searching for prey en route. Potential metrics: swimming at a high rate of speed, no obvious attempt to move head/look around, can be interrupted by breath stops, but not porpoising.
	breath stop	Breathing and resting. Potential metrics: the seal's snout is above water, breathing, but the seal is not moving in any direction just floating.
	searching	Exploratory swimming with intent to locate prey. Potential metrics: a low to medium rate of speed with obvious head movement, direction changes indicating searching, clear verticle movement following the sea floor relief. Can include spy hopping, but that should be noted.
	low light	Behavior cannot be determined because the light in the video is too low.
	non feeding event	Observer can see another identifiable animal, but a feeding event does not follow. If chosen, fill in categories A-B
	feeding	Active pursuit of a visible prey item. If this category is chosen, detail categories C-F
(A) non-pursuit
		Identify the non-pursued, potential prey to the finest taxon and life stage possible.
(B) intra-specific
	aggressive	Interactions with other leopard seals. This is a subjective interpretation of the nature of the interaction, however, use the following metrics (aggressive): chasing, active contact with the other seal (bumping, biting, etc.), any aggressive vocalizations detected. Also, list specific notes (e.g., seals circled each other but did not engage, etc.)
	passive	Same as above, but use the following metrics (passive): no physical contact, or obvious attempt at physical contact. Note swim speed, or any posturing observed.
(C)target species
		Identify the prey to the finest taxon, and life stage possible.
(D)pursuit tactic
	ambush	Moving, usually slowly, into an advantageous position, and using surprise to capture prey. Potential metrics: slowly approaching prey followed by a wait and rush, or quick grasp to capture prey.
	chase	Any accelerated swim, manuvre and/or flail to pursue prey, chases tend to be longer than the 'burst rushes' of ambush techniques.
	flush	A seal using its body, snout, or other means (blowing bubbles,vocalizing, etc.) to move prey out of hiding (e.g. pushing a fish out from under a rock, or lunging at a group of fur seal pups to scare one of them into deeper water)
	stalk	Tracking, and slowly closing the distance to a moving prey, typically ending in a rush to capture.
	incidental	An interaction with a potential prey that was not precipitated by any notable pursuit effort; includes scavenging. -- e.g. it was searching, came across a penguin carcass, and ate it.
	handling	Time spent holding/moving/killing prey item.
	processing	Time spent stripping, manipulating prey and consuming it.
(E)capture success
	yes	The seal retained control of the captured prey until the prey was dead.
	no	The prey escaped.
(F)consumption success
	yes	The seal processed the prey item and consumed it. Make notes on processing technique.
	no	The seal did not consume, or only partially consumed a prey item, and then abondon the prey item without obvious kleptoparisitism.
	kleptoparasitism	The prey item was aggressively taken by another leopard seal. See notes on 'aggressive' behavior above.
